# Supplementary material
Source: Springer Nature journal article supplement (https://www.springermedizin.de/resource/supplementary/12913_2010_1839_MOESM3_ESM.pdf/9529008)
Supplement: MOESM3 [file 9529008]

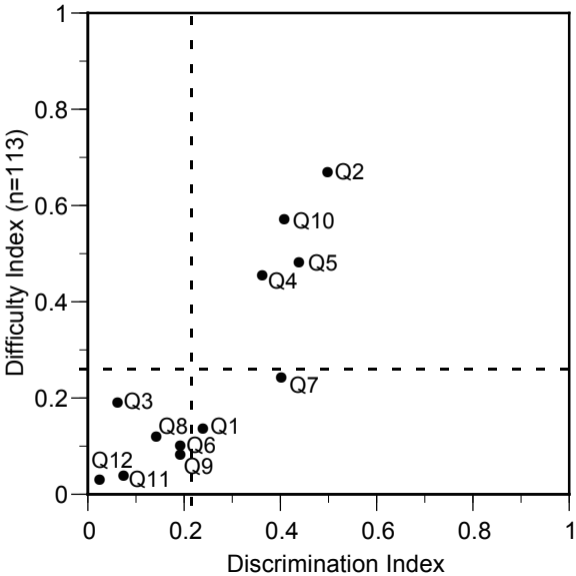

- Q1: Pregnant women with 3 or more prenatal visits
- Q2: Pregnant women with TT2 plus
- Q3: Current Users (Family Planning)
- Q4: New Acceptors (Family Planning)
- Q5: Severely Underweight Children (6-59 months)
- Q6: Pneumonia cases seen (0-59 months)
- Q7: Infants given BCG
- Q8: Fully Immunized Children (9-11 months)
- Q9: Animal bite cases seen (Rabies)
- Q10: Confirmed cases (Malaria)
- Q11: TB symptomatics with sputum exam
- Q12: New sputum positive initiated treatment (TB)
